# Supplementary material
Source: Springer Nature journal article supplement (https://www.springermedizin.de/resource/supplementary/12874_2010_551_MOESM2_ESM.pdf/9432454)

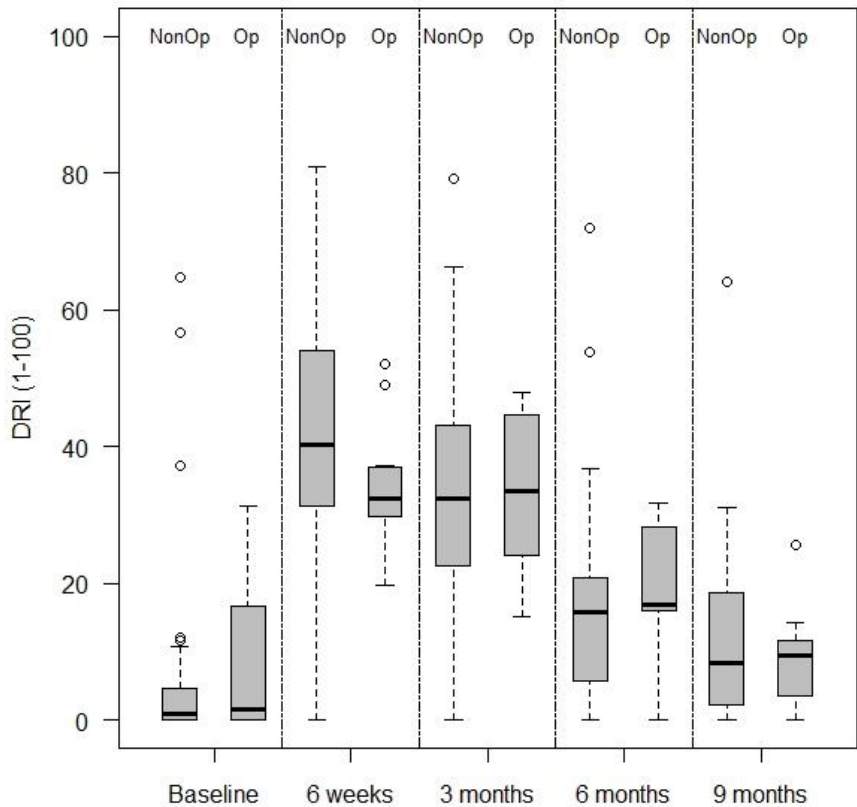

Supplement: MOESM2 [file 9432454]
